# Supplementary material for: Terms That Refer to Homeless Populations: National Surveys of Several Stakeholder Groups
Source: Atypon-hosted journal article supplement (doi:10.1176/appi.ps.202100708), 2022-07-27
Supplement: appi.ps.202100708.ds001.pdf [file appi.ps.202100708.ds001.pdf]

Supplementary Table 1. Preferred terms of providers, researchers, and policymakers when referring to homeless and at-risk individuals

| Preferred terms for:                                                                | Providers<br>(n = 319) |             | Researchers<br>(n = 40) |             | Policymakers<br>(n = 53) |             |
|-------------------------------------------------------------------------------------|------------------------|-------------|-------------------------|-------------|--------------------------|-------------|
|                                                                                     | Count                  | %           | Count                   | %           | Count                    | %           |
| <b><u>Writing about persons living in places not meant for human habitation</u></b> |                        |             |                         |             |                          |             |
| Homeless person                                                                     | <b>119</b>             | 37.3        | 4                       | 10.0        | 10                       | 18.9        |
| Houseless person                                                                    | 5                      | 1.6         | --                      | --          | 1                        | 1.9         |
| Roofless person                                                                     | --                     | --          | --                      | --          | 1                        | 1.9         |
| Unsheltered person                                                                  | 29                     | 9           | 2                       | 5.0         | 11                       | 20.7        |
| Person experiencing homelessness                                                    | <b>145</b>             | <b>45.5</b> | <b>27</b>               | <b>67.5</b> | <b>29</b>                | <b>54.7</b> |
| Other                                                                               | 21                     | 6.6         | 7                       | 17.5        | 1                        | 1.9         |
| <b><u>Talking about persons living in places not meant for human habitation</u></b> |                        |             |                         |             |                          |             |
| Homeless person                                                                     | <b>131</b>             | 41.1        | 10                      | <b>25</b>   | <b>18</b>                | <b>34.0</b> |
| Houseless person                                                                    | 4                      | 1.3         | --                      | --          | 1                        | 1.9         |
| Roofless person                                                                     | --                     | --          | --                      | --          | --                       | --          |
| Unsheltered person                                                                  | 41                     | 12.9.6      | 8                       | 20.0        | 12                       | 22.6        |
| Person experiencing homelessness                                                    | <b>125</b>             | <b>39.2</b> | <b>16</b>               | <b>40.0</b> | <b>21</b>                | <b>39.6</b> |
| Other                                                                               | 18                     | 5.6         | 6                       | 15          | 1                        | 1.9         |
| <b><u>Writing about persons staying in a shelter</u></b>                            |                        |             |                         |             |                          |             |
| Homeless person                                                                     | 80                     | 25.1        | 3                       | 7.50        | 8                        | 15.1        |
| Sheltered person                                                                    | 20                     | 6.3         | 7                       | 17.50       | 8                        | 15.1        |
| Shelter resident                                                                    | 74                     | 23.2        | 6                       | 15.0        | 15                       | 28.3        |
| Person in shelter                                                                   | <b>118</b>             | <b>37.0</b> | <b>16</b>               | <b>40.0</b> | <b>16</b>                | <b>30.2</b> |
| Other                                                                               | 27                     | 8.5         | 8                       | 20.0        | 6                        | 11.3        |
| <b><u>Talking about persons staying in a shelter</u></b>                            |                        |             |                         |             |                          |             |
| Homeless person                                                                     | 80                     | 25.1        | 3                       | 7.5         | 7                        | 13.2        |
| Sheltered person                                                                    | 25                     | 7.8         | 7                       | 17.5        | 8                        | 15.1        |
| Shelter resident                                                                    | 68                     | 21.3        | 7                       | 17.5        | 15                       | 28.3        |

|                                                                                                          |            |             |           |             |           |             |
|----------------------------------------------------------------------------------------------------------|------------|-------------|-----------|-------------|-----------|-------------|
| Person in shelter                                                                                        | <b>120</b> | <b>37.6</b> | <b>16</b> | <b>40.0</b> | <b>17</b> | <b>32.1</b> |
| Other                                                                                                    | 26         | 8.2         | 7         | 17.5        | 6         | 11.3        |
| <b><u>Writing about persons at risk of homelessness</u></b>                                              |            |             |           |             |           |             |
| Housing insecure person                                                                                  | 4          | 1.3         | --        | --          | --        | --          |
| Person at-risk of homelessness                                                                           | <b>174</b> | <b>54.5</b> | <b>14</b> | <b>35.0</b> | <b>28</b> | <b>52.8</b> |
| Person experiencing housing instability                                                                  | 48         | 15.1        | <b>12</b> | <b>30.0</b> | 13        | 24.5        |
| Person experiencing housing insecurity                                                                   | 23         | 7.2         | 11        | <b>27.5</b> | 4         | 7.6         |
| Unstably housed person                                                                                   | 62         | 19.4        | 3         | 7.5         | 8         | 15.1        |
| Other                                                                                                    | 8          | 2.5         | --        | --          | --        | --          |
| <b><u>Talking about persons at risk of homelessness</u></b>                                              |            |             |           |             |           |             |
| Housing insecure person                                                                                  | 2          | 0.6         | --        | --          | 1         | 1.9         |
| Person at-risk of homelessness                                                                           | <b>180</b> | <b>56.4</b> | <b>14</b> | <b>35.0</b> | <b>28</b> | <b>52.8</b> |
| Person experiencing housing instability                                                                  | 51         | 16.0        | 11        | 27.5        | 13        | 24.5        |
| Person experiencing housing insecurity                                                                   | 17         | 5.3         | 10        | 25.0        | 2         | 3.8         |
| Unstably housed person                                                                                   | 63         | 19.8        | 5         | 12.5        | 9         | 17.0        |
| Other                                                                                                    | 6          | 1.9         | --        | --          | --        | --          |
| <b><u>Writing about persons who have resolved their homelessness but receiving homeless services</u></b> |            |             |           |             |           |             |
| Homeless client                                                                                          | 20         | 6.2         | --        | --          | 3         | 5.7         |
| Formerly homeless person                                                                                 | <b>101</b> | <b>31.7</b> | 9         | <b>22.5</b> | <b>23</b> | <b>43.4</b> |
| Homeless-experienced person                                                                              | 12         | 3.8         | 5         | 12.5        | 4         | 7.5         |
| Homeless service user                                                                                    | 14         | 4.4         | 2         | 5.0         | 3         | 5.7         |
| Person who was formerly homeless                                                                         | <b>106</b> | <b>33.2</b> | <b>18</b> | <b>45.0</b> | <b>17</b> | <b>32.0</b> |
| Other                                                                                                    | 66         | 20.7        | 6         | 15.0        | 3         | 5.7         |
| <b><u>Talking about persons who have resolved their homelessness but receiving homeless services</u></b> |            |             |           |             |           |             |
| Homeless client                                                                                          | 16         | 5.0         | --        | --          | 2         | 3.8         |
| Formerly homeless person                                                                                 | <b>109</b> | <b>34.2</b> | 11        | <b>27.5</b> | <b>25</b> | <b>47.2</b> |

|                                  |            |             |           |             |           |             |
|----------------------------------|------------|-------------|-----------|-------------|-----------|-------------|
| Homeless-experienced person      | 11         | 3.4         | 5         | 12.5        | 2         | 3.8         |
| Homeless service user            | 12         | 3.8         | 2         | 5.0         | 4         | 7.6         |
| Person who was formerly homeless | <b>105</b> | <b>32.9</b> | <b>17</b> | <b>42.5</b> | <b>17</b> | <b>32.1</b> |
| Other                            | 66         | 20.7        | 5         | 12.5        | 3         | 5.7         |

Note: To highlight frequent categories, cells over 30% were bolded.

Supplementary Table 2. “Other” terms used by providers, researchers, and policymakers when referring to homeless and at-risk individuals

|                                                                                         | <b>Providers<br/>(n= 39)</b> |          | <b>Researchers<br/>(n= 13)</b> |          | <b>Policymakers (n=2)</b>       |          |
|-----------------------------------------------------------------------------------------|------------------------------|----------|--------------------------------|----------|---------------------------------|----------|
|                                                                                         | <b>Count</b>                 | <b>%</b> | <b>Count</b>                   | <b>%</b> | <b>Count</b>                    | <b>%</b> |
| <b>Writing/talking about persons living in places not meant for human habitation</b>    |                              |          |                                |          |                                 |          |
| “Person living in a place not meant for human habitation”                               | 6                            | 15.4     | 2                              | 15.38    | --                              | --       |
| “Person living on the street”                                                           | 1                            | 2.6      | 2                              | 15.38    | --                              | --       |
| “Person without stable housing”                                                         | 7                            | 18.0     | 3                              | 23.08    | --                              | --       |
| “Uninhabitable housing situation”                                                       | 2                            | 5.1      | 2                              | 15.38    | --                              | --       |
| “Unhoused”                                                                              | 3                            | 7.7      | --                             | --       | -                               | --       |
| “Homeless individual”                                                                   | 5                            | 12.8     | --                             | --       | 2                               | 100      |
| “Person is homeless”/“experiencing homelessness”                                        | 10                           | 25.6     | 4                              | 30.78    | --                              | --       |
| “Housing insecure”                                                                      | --                           | --       | --                             | --       | --                              | --       |
| “Client”/“Veteran”/“Individual”/ person’s name without circumstance/situation mentioned | 3                            | 7.7      | --                             | --       | --                              | --       |
| “No preference”                                                                         | 2                            | 5.1      | --                             | --       | --                              | --       |
| <b>Writing/talking about persons staying in a shelter</b>                               |                              |          |                                |          |                                 |          |
|                                                                                         | <b>Providers<br/>(n= 53)</b> |          | <b>Researchers<br/>(n= 13)</b> |          | <b>Policymakers<br/>(n= 12)</b> |          |
|                                                                                         | <b>Count</b>                 | <b>%</b> | <b>Count</b>                   | <b>%</b> | <b>Count</b>                    | <b>%</b> |
| “Homeless Person/Individual”                                                            | 4                            | 7.56     | --                             | --       | 2                               | 16.67    |
| “Person experiencing homelessness”                                                      | 13                           | 24.53    | 8                              | 61.53    | 2                               | 16.67    |
| “Person residing/staying in a shelter”                                                  | 8                            | 15.09    | 2                              | 15.38    | 2                               | 16.67    |
| “Sheltered homeless person”                                                             | 2                            | 3.77     | --                             | --       | 2                               | 16.67    |
| “Shelter guest”                                                                         | 2                            | 3.77     | --                             | --       | --                              | --       |
| “Transitional housing”                                                                  | 2                            | 3.77     | --                             | --       | --                              | --       |
| “Homeless person in a shelter”                                                          | 5                            | 9.43     | --                             | --       | 2                               | 16.67    |

|                                                                                                           |                           |          |                             |          |                             |          |
|-----------------------------------------------------------------------------------------------------------|---------------------------|----------|-----------------------------|----------|-----------------------------|----------|
| “Person temporarily housed/housed in a shelter”                                                           | 4                         | 7.56     | 3                           | 23.08    | 2                           | 16.67    |
| Referred to name of program the person is enrolled in or mention utilization of services.                 | 2                         | 3.77     | --                          | --       | --                          | --       |
| “Client”/“Individual”/“Person’s name without circumstance/situation mentioned”                            | 9                         | 16.98    | --                          | --       | --                          | --       |
| “No preference”                                                                                           | 2                         | 3.77     | --                          | --       | --                          | --       |
| <b>Writing/talking about persons at risk of being homeless</b>                                            | <b>Providers (n= 14)</b>  | <b>%</b> | <b>Researchers</b>          | <b>%</b> | <b>Policymakers</b>         | <b>%</b> |
|                                                                                                           | <b>Count</b>              | <b>%</b> | <b>Count</b>                | <b>%</b> | <b>Count</b>                | <b>%</b> |
| “Imminent homelessness”/“risk of homelessness”                                                            | 7                         | 50       | --                          | --       | --                          | --       |
| “Person at risk of becoming houseless”                                                                    | 2                         | 14.29    | --                          | --       | --                          | --       |
| “Person at risk of homelessness”                                                                          | 1                         | 7.14     | --                          | --       | --                          | --       |
| “Person at risk of becoming houseless”                                                                    | 3                         | 21.42    | --                          | --       | --                          | --       |
| “No preference”                                                                                           | 1                         | 7.14     | --                          | --       | --                          | --       |
| <b>Writing/talking about persons who have resolved their homelessness but receiving homeless services</b> | <b>Providers (n= 132)</b> | <b>%</b> | <b>Researchers (n = 11)</b> | <b>%</b> | <b>Policymakers (n = 6)</b> | <b>%</b> |
|                                                                                                           | <b>Count</b>              | <b>%</b> | <b>Count</b>                | <b>%</b> | <b>Count</b>                | <b>%</b> |
| “Chronically homeless”                                                                                    | 2                         | 1.52     | --                          | --       | 2                           | 33.33    |
| “Currently/recently housed or stably housed”                                                              | 36                        | 27.27    | --                          | --       | --                          | --       |
| “Person formerly/no longer experiencing homelessness”                                                     | 16                        | 12.12    | 4                           | 36.36    | --                          | --       |
| “Person with history of housing instability”                                                              | 2                         | 1.52     | --                          | --       | --                          | --       |
| Referred to name of program the person is enrolled in or mention utilization of services.                 | 36                        | 27.27    | 5                           | 45.45    | --                          | --       |

|                                                                                          |    |       |    |       |    |       |
|------------------------------------------------------------------------------------------|----|-------|----|-------|----|-------|
| “Client”/“Veteran”/“Individual”/“Person’s name without circumstance/situation mentioned” | 38 | 28.78 | -- | --    | 4  | 66.67 |
| “Depends on context/purpose”                                                             | -- | --    | 2  | 18.18 | -- | --    |
| “No preference”                                                                          | 2  | 1.52  | -- | --    | -- | --    |

Note: Some participants specifically referred to “veterans” in their responses, which was changed to “persons” in the table to be generalizable and consistent with responses from participants not working in VA.
